# Supplementary material
Source: Springer Nature journal article supplement (https://www.springermedizin.de/resource/supplementary/12872_2007_28_MOESM3_ESM.pdf/9431160)

A

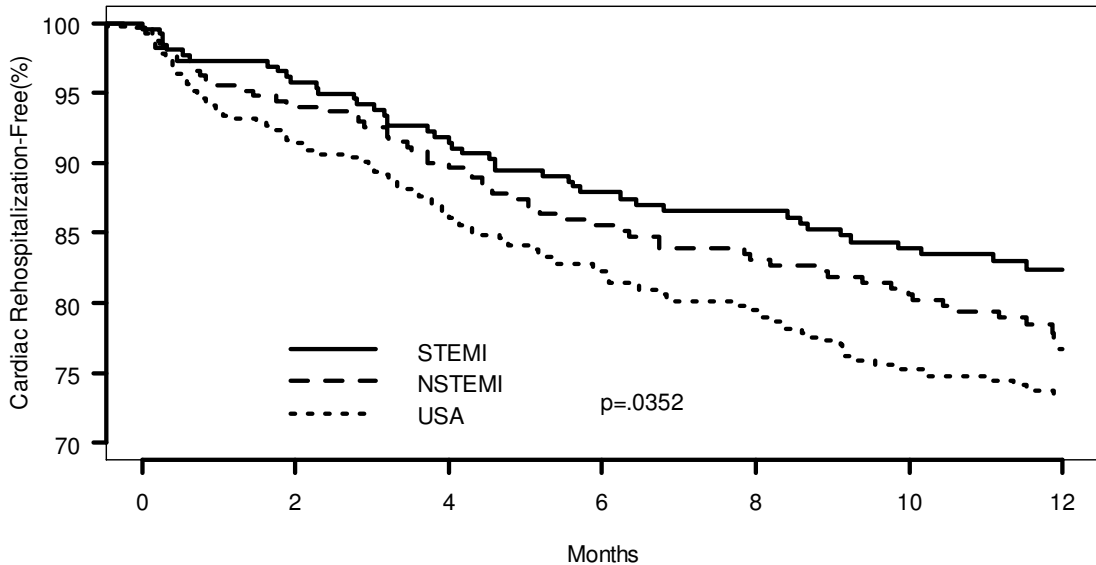

B

- Model 1: UA vs. STEMI
- Model 2: UA vs. STEMI
- Model 3: UA vs. STEMI
- Model 4: UA vs. STEMI
- Model 6: UA vs. STEMI

- Model 1: UA vs. NSTEMI
- Model 2: UA vs. NSTEMI
- Model 3: UA vs. NSTEMI
- Model 4: UA vs. NSTEMI
- Model 6: UA vs. NSTEMI

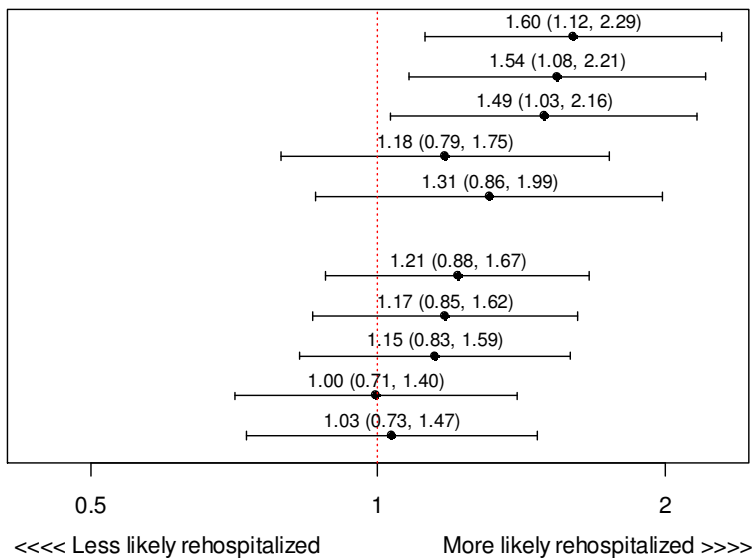

Supplement: MOESM3 [file 9431160]
